# Supplementary material for: Jahn–Teller distortions boost the ultrahigh areal capacity and cycling robustness of holey NiMn-hydroxide nanosheets for flexible energy storage devices
Source: Royal Society of Chemistry journal article supplement (doi:10.1039/d0nr06225a), 2020-01-01
Supplement: d0nr06225a1.pdf [file d0nr06225a1.pdf]

**Jahn–Teller Distortion Boosts Holey NiMn-Hydroxide Nanosheets Ultrahigh Areal  
Capacity and Cycling Robustness for Flexible Energy Storage Devices**

Ruyi Chen,<sup>a,b</sup> Jialu Xue,<sup>b</sup> Xiaoliang Gao,<sup>b</sup> Chenyang Yu,<sup>b</sup> Qiang Chen,<sup>a</sup> Jinyuan Zhou,<sup>d</sup>

Gengzhi Sun,<sup>a,b,\*</sup> Wei Huang<sup>b,c</sup>

<sup>a</sup> *School of Materials Science and Engineering, Henan Polytechnic University, Jiaozuo  
454003, P. R. China*

<sup>b</sup> *Institute of Advanced Materials (IAM), Nanjing Tech University (NanjingTech),  
Nanjing 211816, P. R. China*

<sup>c</sup> *Institute of Flexible Electronics (IFE), Northwestern Polytechnical University (NPU),  
Xi'an 710072, P. R. China*

<sup>d</sup> *School of Physical Science and Technology, Lanzhou University, Lanzhou 730000, P.  
R. China*

\*Corresponding author. E-mail address: iamgzsun@njtech.edu.cn

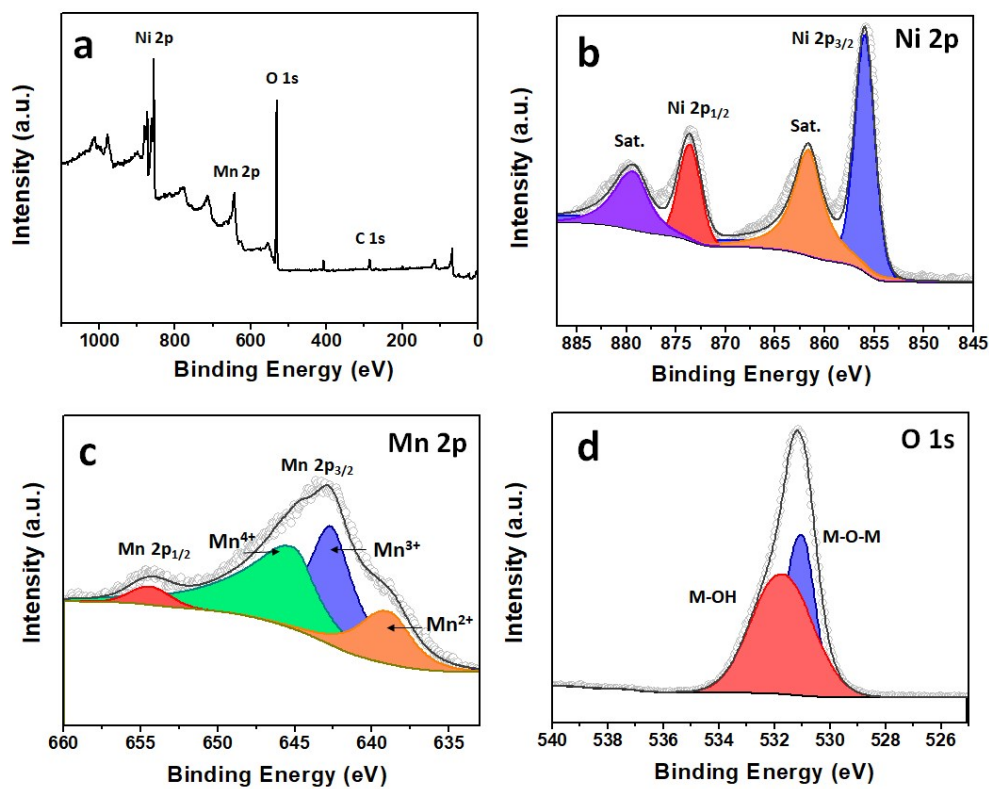

**Fig. S1** (a) XPS surface survey. (b) Ni 2p, (c) Mn 2p, and (d) O 1s core-level XPS spectra of NiMn-OH-50%.

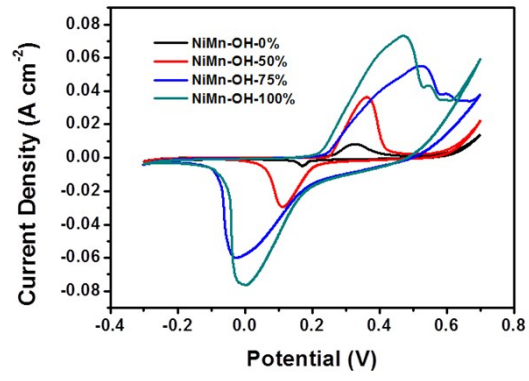

**Fig. S2** CV curves of NiMn-OH-0%, NiMn-OH-50%, NiMn-OH-75%, and NiMn-OH-100%.

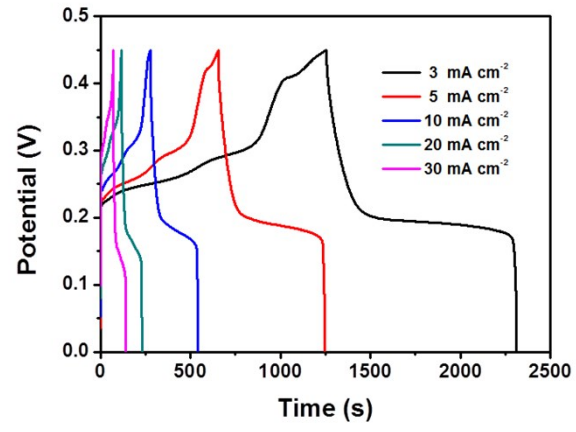

**Fig. S3** GCD curves for NiMn-OH-100% at different currents.

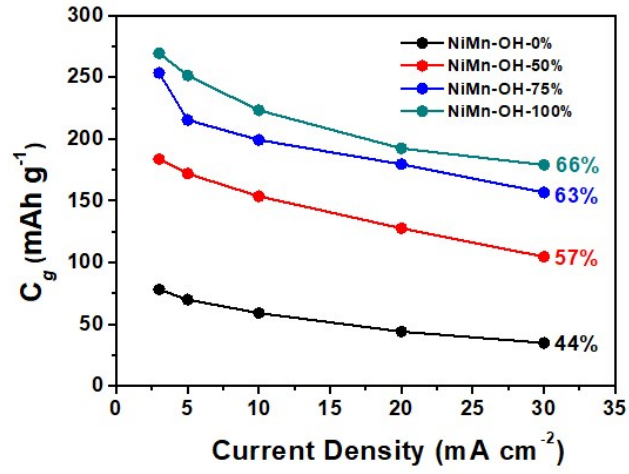

**Fig. S4** The capacities of NiMn-OH-0%, NiMn-OH-50%, NiMn-OH-75%, and NiMn-OH-100% at different current densities.

Table S1 Performance comparison of our electrode and others reported in literatures.

| Electroactive materials                                        | Areal capacity ( $\mu\text{Ah cm}^{-2}$ ) | Mass capacity ( $\text{mAh g}^{-1}$ ) | Current density                                                     | Rate capability                       | Reference |
|----------------------------------------------------------------|-------------------------------------------|---------------------------------------|---------------------------------------------------------------------|---------------------------------------|-----------|
| NiMn-OH                                                        | 881                                       | 269                                   | $3 \text{ mA cm}^{-2}$<br>( $0.92 \text{ A g}^{-1}$ ) <sup>1)</sup> | 66%<br>( $30 \text{ mA cm}^{-2}$ )    | This work |
| CoNiO <sub>2</sub> @Ni(OH) <sub>2</sub>                        | 674                                       | 539                                   | $1 \text{ mA cm}^{-2}$                                              | 70%<br>( $10 \text{ mA cm}^{-2}$ )    | 1         |
| H-CoO <sub>x</sub> @Ni(OH) <sub>2</sub>                        | 820.4                                     | 335.5                                 | $5.2 \text{ mA cm}^{-2}$ ( $2 \text{ A g}^{-1}$ )                   | 68%<br>( $50 \text{ A g}^{-1}$ )      | 2         |
| Ni <sub>3</sub> S <sub>2</sub> @Ni(OH) <sub>2</sub>            | 588.2                                     | 158.5                                 | $5.1 \text{ A g}^{-1}$                                              | 38%<br>( $19.8 \text{ A g}^{-1}$ )    | 3         |
| Cu-Doped NiCo-LDH/CuO                                          | 310                                       | 193.3                                 | $1.5 \text{ mA cm}^{-2}$                                            | 79%<br>( $40 \text{ mA cm}^{-2}$ )    | 4         |
| Cu <sub>3</sub> Mo <sub>2</sub> O <sub>9</sub> NCAs            | 449.5                                     | 112.3                                 | $2 \text{ mA cm}^{-2}$                                              | 44%<br>( $30 \text{ mA cm}^{-2}$ )    | 5         |
| CuCo <sub>2</sub> O <sub>4</sub> @CoMoO <sub>4</sub>           | 500                                       | -                                     | $2 \text{ mA cm}^{-2}$                                              | 66.7%<br>( $80 \text{ mA cm}^{-2}$ )  | 6         |
| CuCo <sub>2</sub> O <sub>4</sub> @Ni(OH) <sub>2</sub>          | 439                                       | -                                     | $2 \text{ mA cm}^{-2}$                                              | 82.7%<br>( $80 \text{ mA cm}^{-2}$ )  | 7         |
| Ni <sub>0.54</sub> Co <sub>0.46</sub> O <sub>2</sub> nanosheet | 438                                       | 238                                   | $1 \text{ mA cm}^{-2}$                                              | 90.3%<br>( $80 \text{ mA cm}^{-2}$ )  | 8         |
| Ni <sub>0.54</sub> Co <sub>0.46</sub> O <sub>2</sub> nanowire  | 394.1                                     | 218.9                                 | $1 \text{ mA cm}^{-2}$                                              | 55%<br>( $40 \text{ mA cm}^{-2}$ )    | 8         |
| NiCo <sub>2</sub> S <sub>4</sub> @Ni(OH) <sub>2</sub>          | 680                                       | 240.3                                 | $5 \text{ mA cm}^{-2}$                                              | 94.9%<br>( $100 \text{ mA cm}^{-2}$ ) | 9         |
| NiS                                                            | 410                                       | 177.1                                 | $2.3 \text{ mA cm}^{-2}$                                            | 49%<br>( $10 \text{ A g}^{-1}$ )      | 10        |

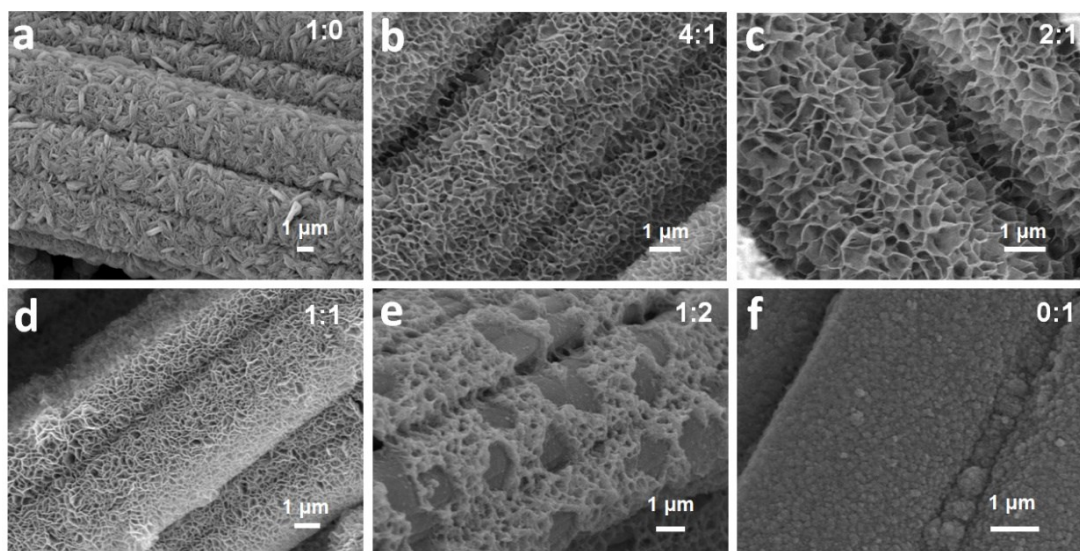

**Fig. S5** SEM images of the products from different Ni and Mn feeding mole ratios: (a) 1:0, (b) 4:1, (c) 2:1, (d) 1:1, (e) 1:2, (f) 0:1.

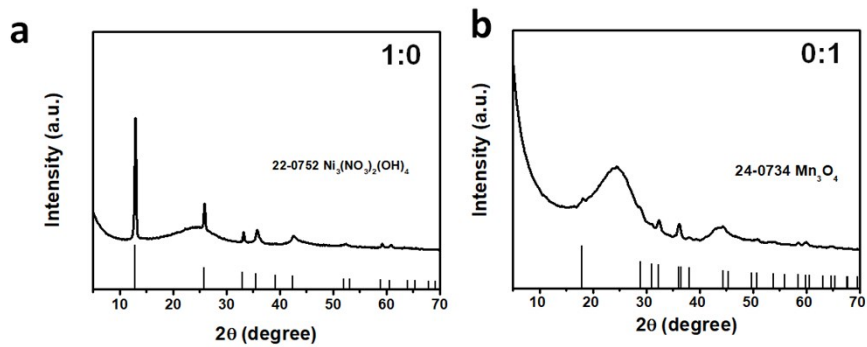

**Fig. S6** XRD pattern of the products from Ni and Mn feeding ratio of (a) 1:0 and (b) 0:1.



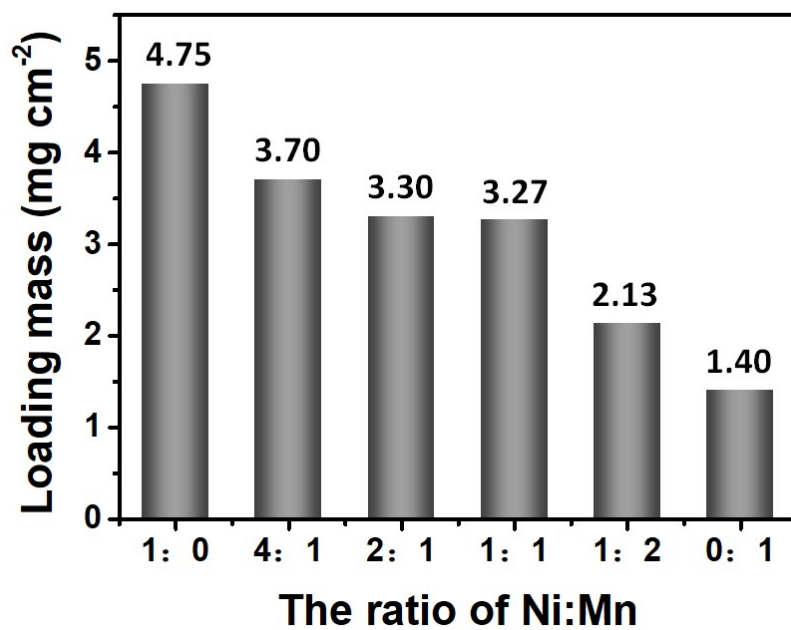

**Fig. S7** The mass loading of solvothermal products as a function of different Ni:Mn ratio.

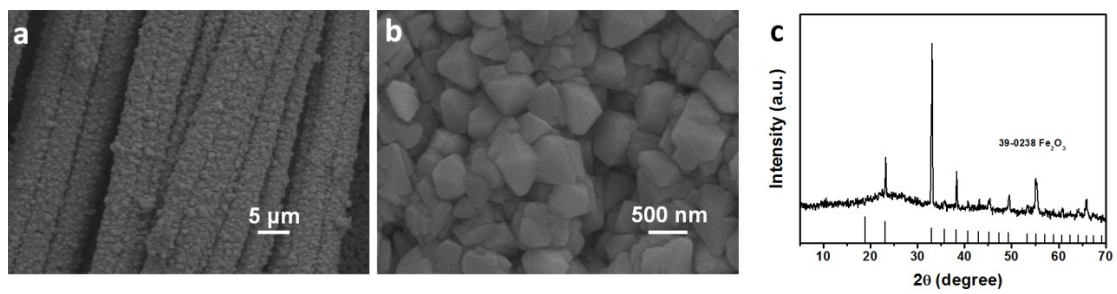

**Fig. S8** (a, b) SEM images and (c) XRD pattern of  $\text{Fe}_2\text{O}_3/\text{CC}$ .

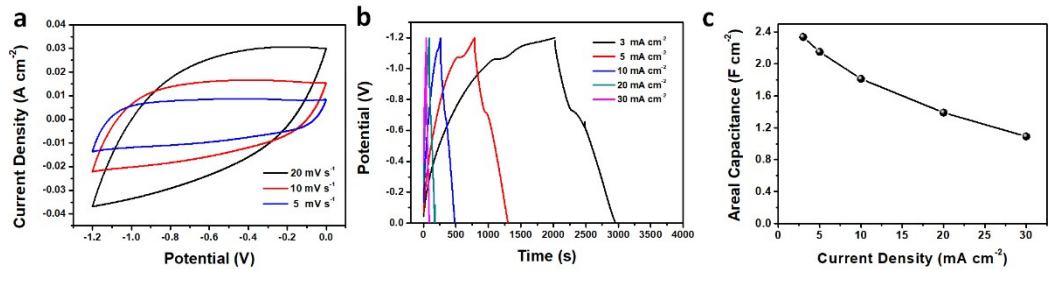

**Fig. S9** (a) CV and (b) GCD curves of  $\text{Fe}_2\text{O}_3/\text{CC}$  electrode. (c) The areal capacitance of  $\text{Fe}_2\text{O}_3/\text{CC}$  electrode at different current densities.

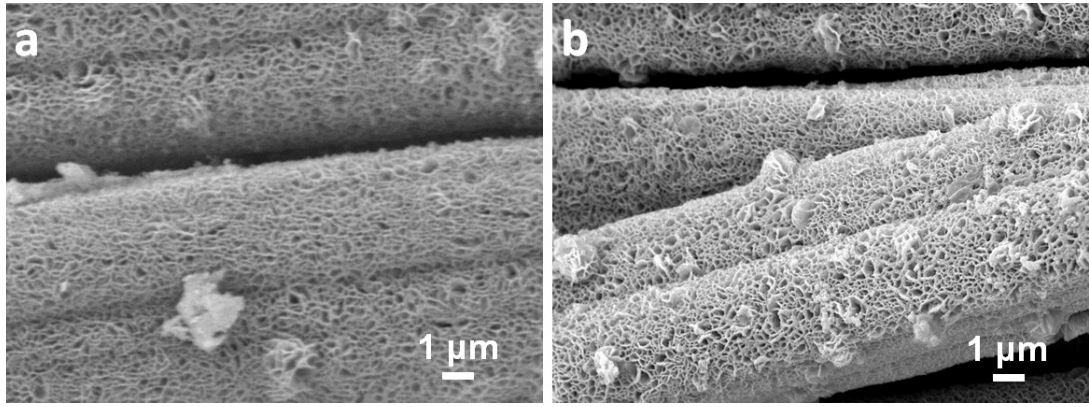

**Fig. S10** SEM images of NiMn-OH-100% electrode (a) before and (b) after 10000 GCD cycles.

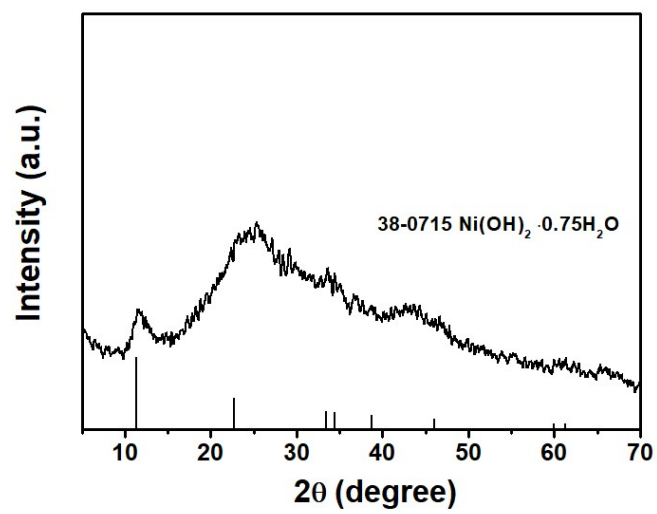

**Fig. S11** XRD pattern of NiMn-OH-100% electrode after 10000 GCD cycles.

## Reference

- 1 Q. Li, Q. Zhang, J. Sun, C. Liu, J. Guo, B. He, Z. Zhou, P. Man, C. Li, L. Xie and Y. Yao, *Adv. Sci.*, 2019, **6**, 1801379.
- 2 J. Zhu, L. Huang, Y. Xiao, L. Shen, Q. Chen and W. Shi, *Nanoscale*, 2014, **6**, 6772-6781.
- 3 W. Zhou, X. Cao, Z. Zeng, W. Shi, Y. Zhu, Q. Yan, H. Liu, J. Wang and H. Zhang, *Energy Environ. Sci.*, 2013, **6**, 2216-2221.
- 4 Y. Guo, X. Hong, Y. Wang, Q. Li, J. Meng, R. Dai, X. Liu, L. He and L. Mai, *Adv. Funct. Mater.*, 2019, **29**, 1809004.
- 5 S. M. Cha, S. Chandra Sekhar, R. Bhimanaboina and J. S. Yu, *Inorg. chem.*, 2018, **57**, 8440-8450.
- 6 J. Xie, Z. Zhan, S. Zhang, G. Li, H. Xia, Y. Yang and J. Xiong, *Mate. Lett.*, 2018, **226**, 30-33.
- 7 Z. Zhan, S. Chen, J. Xie, Y. Yang and J. Xiong, *J. Alloy. Compd.*, 2017, **722**, 928-937.
- 8 Y. Jiang, L. Zhang, H. Zhang, C. Zhang and S. Liu, *J. Power Sources*, 2016, **329**, 473-483.
- 9 Y. Yang, D. Cheng, S. Chen, Y. Guan and J. Xiong, *Electrochim. Acta*, 2016, **193**, 116-127.
- 10 J. Xu, L. Zhang, G. Xu, Z. Sun, C. Zhang, X. Ma, C. Qi, L. Zhang and D. Jia, *Appl. Surf. Sci.*, 2018, **434**, 112-119.
